# Supplementary material for: Ribosomal biogenesis regulator DIMT1 controls β-cell protein synthesis, mitochondrial function, and insulin secretion
Source: PubMed Central journal article supplement (PMC8913306; doi:10.1016/j.jbc.2022.101692), 2022-02-08

# Supplementary Figure S1

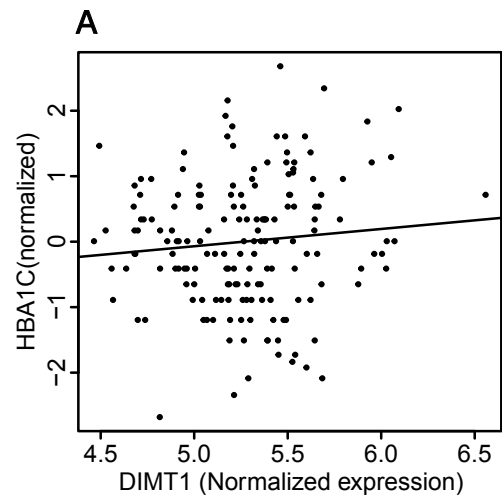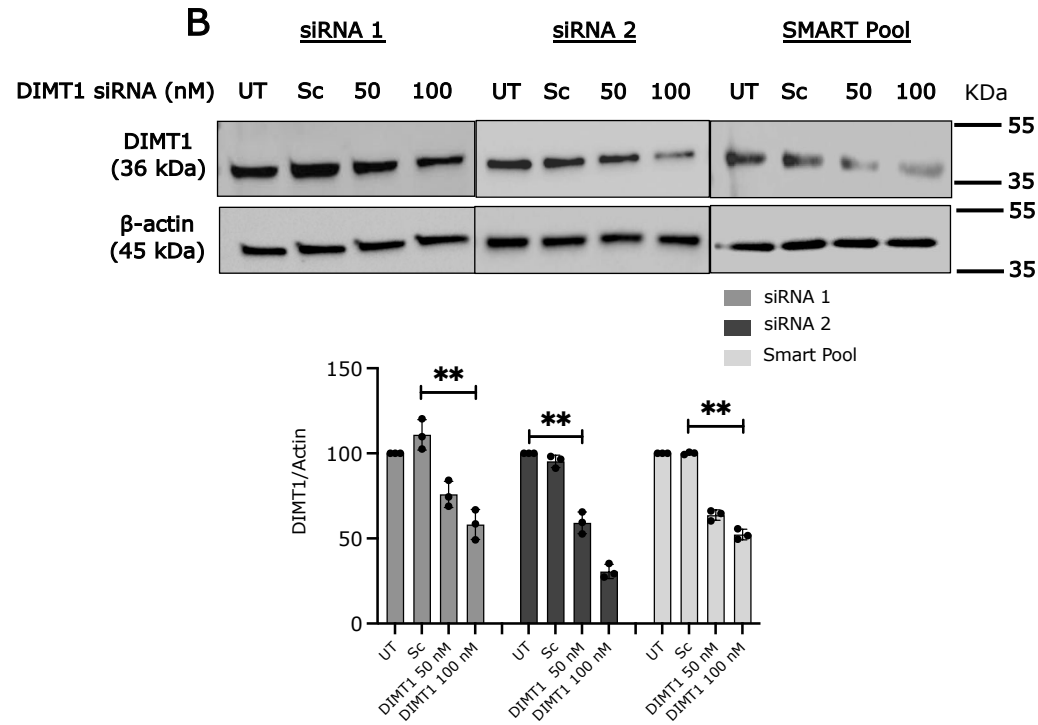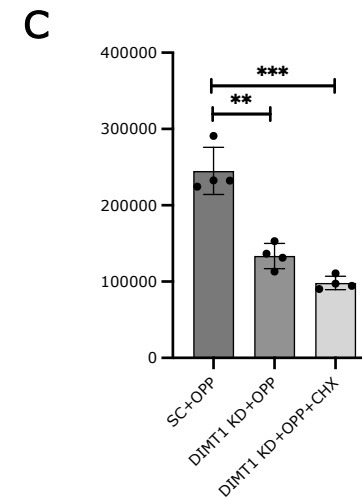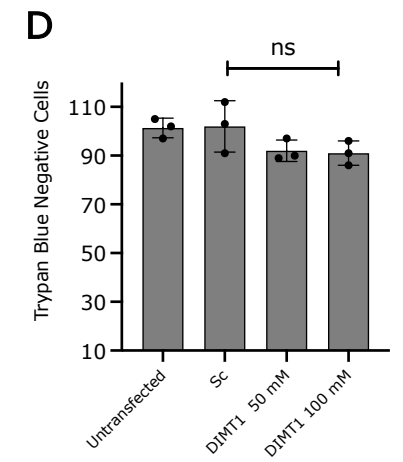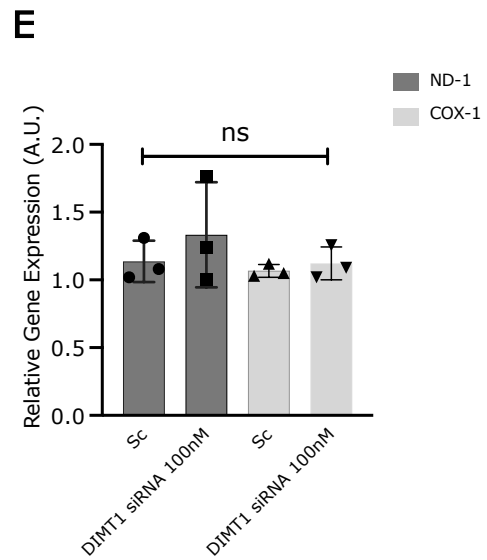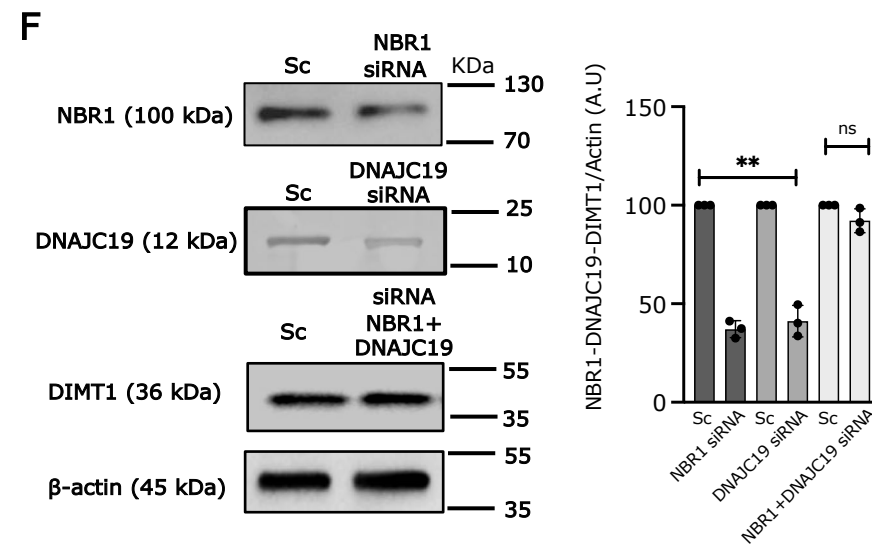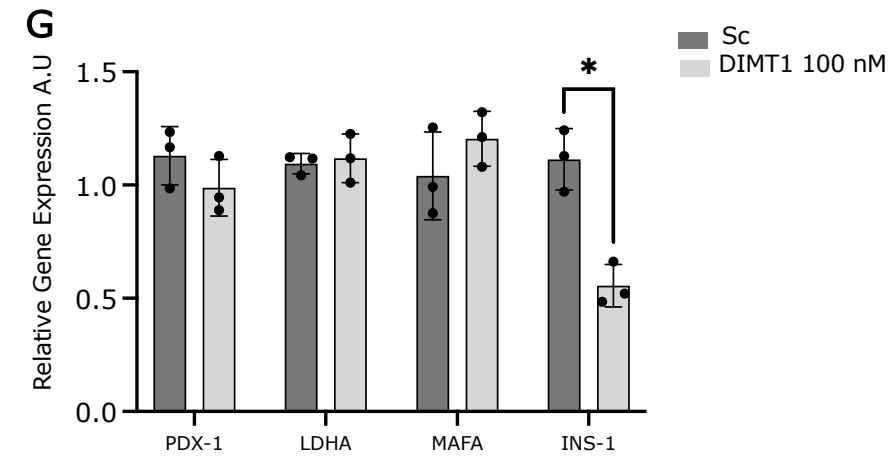

# Supplementary Figure S2

Primer Extension Method Schematic.

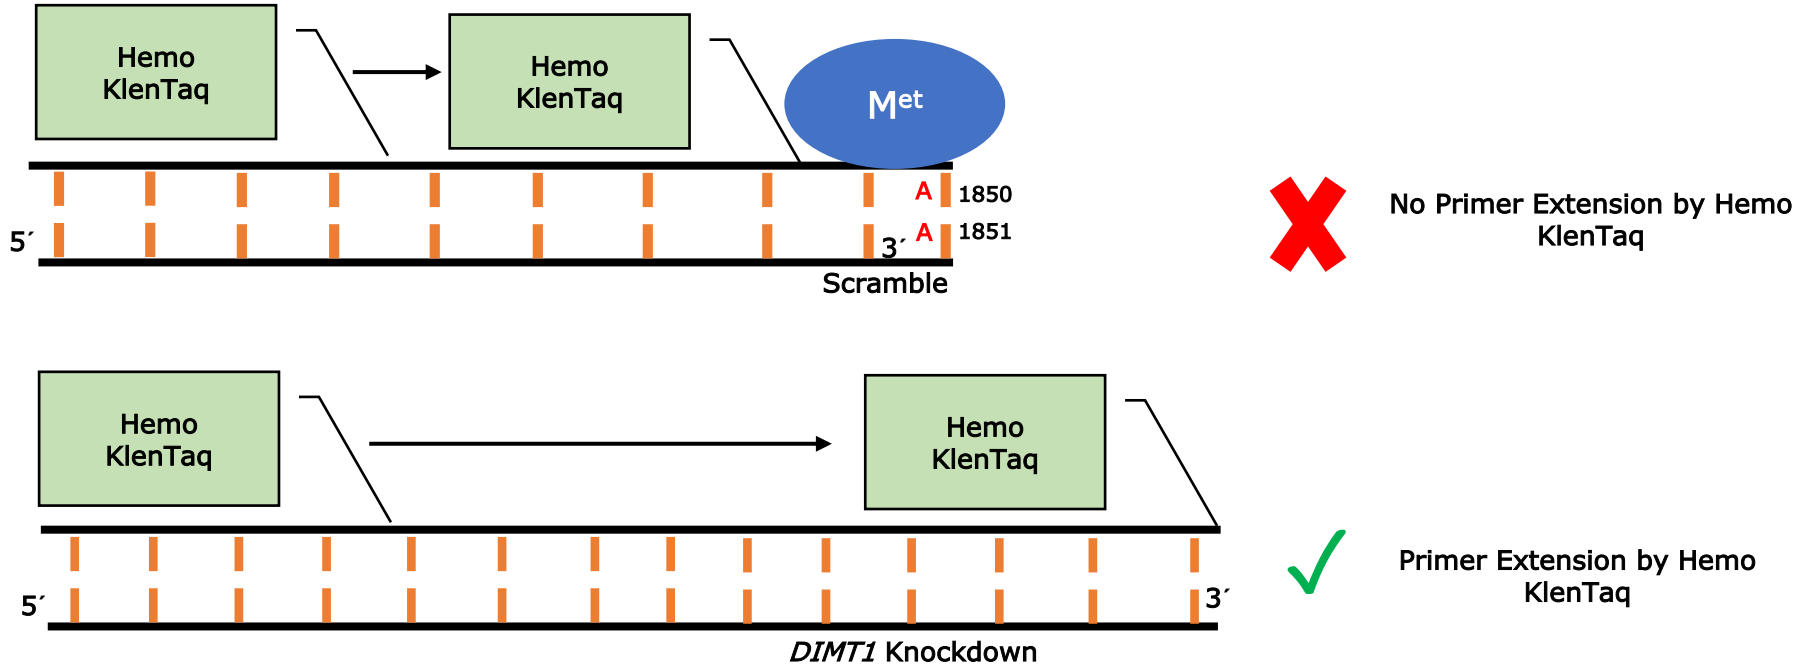

The relative gene expression ratio ( $R$ ) of a target gene is calculated based on efficiency ( $E$ ) and the cycle threshold ( $Ct$ ) deviation of an unknown sample versus a control, and expressed in comparison to a reference gene;

$$\text{Ratio} = \frac{E(\text{Target})^{\Delta Ct \text{ Target}(\text{Control}-\text{Target})}}{E(\text{Ref})^{\Delta Ct \text{ Ref}(\text{Control}-\text{Target})}}$$

# Supplementary Figure S3

## PANTHER Pathway Analysis.

A

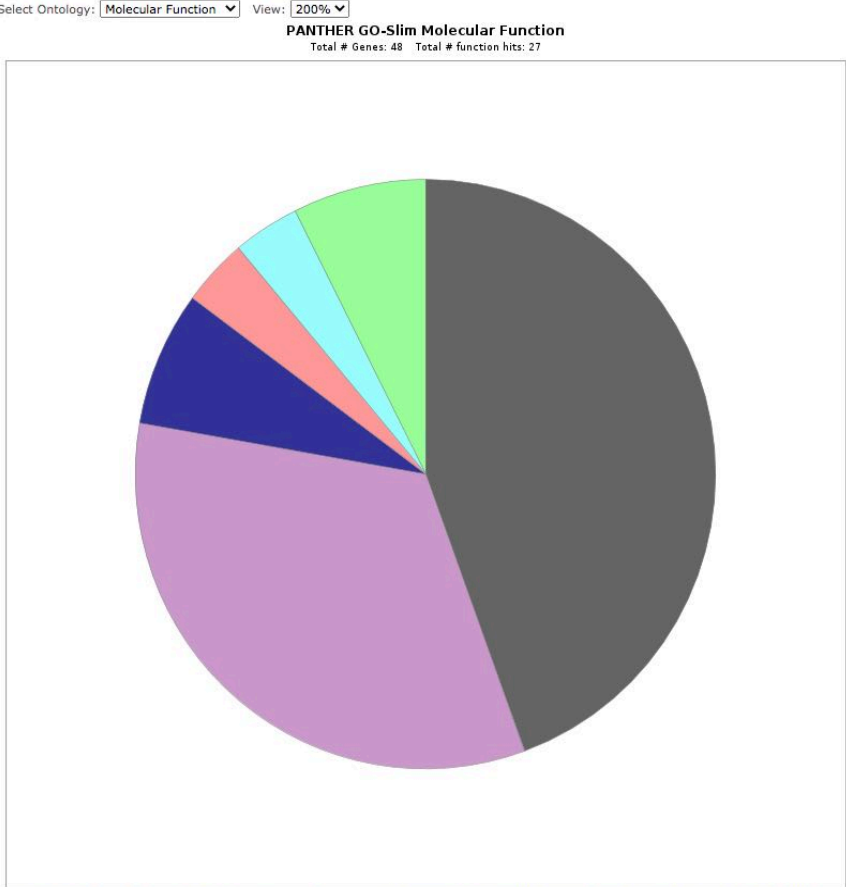

\*\*Chart tooltips are read as: Category name (Accession): # genes; Percent of gene hit against total # genes; Percent of gene hit against total # Function hits

B

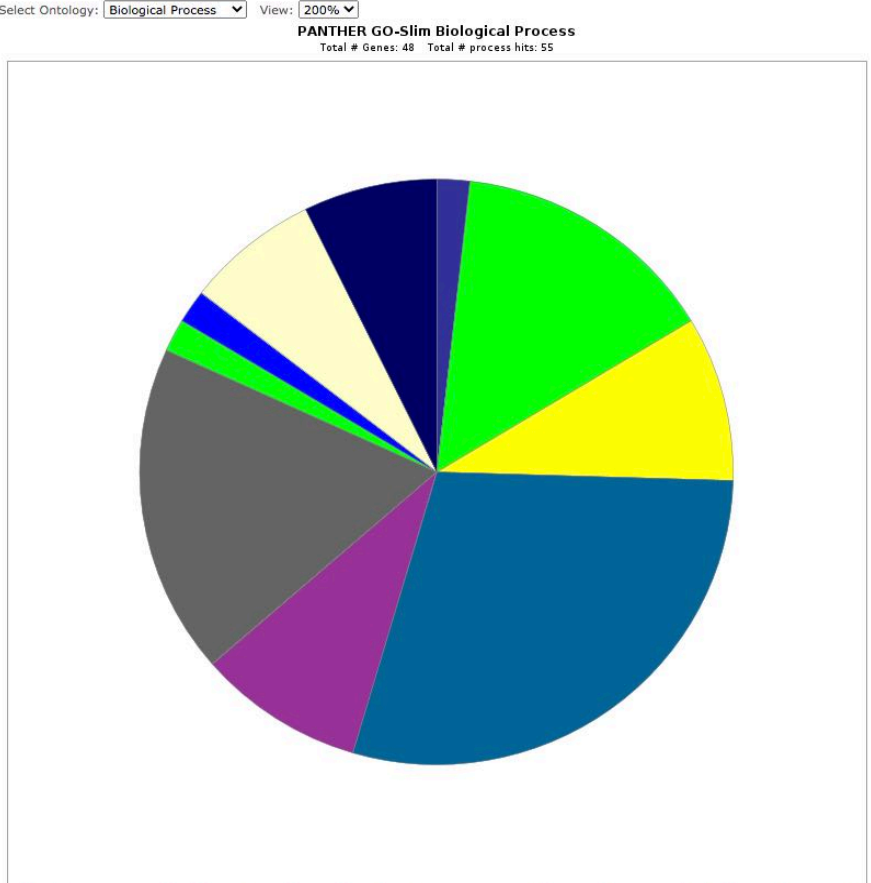

\*\*Chart tooltips are read as: Category name (Accession): # genes; Percent of gene hit against total # genes; Percent of gene hit against total # Process hits

Supplementary  
Figure S4

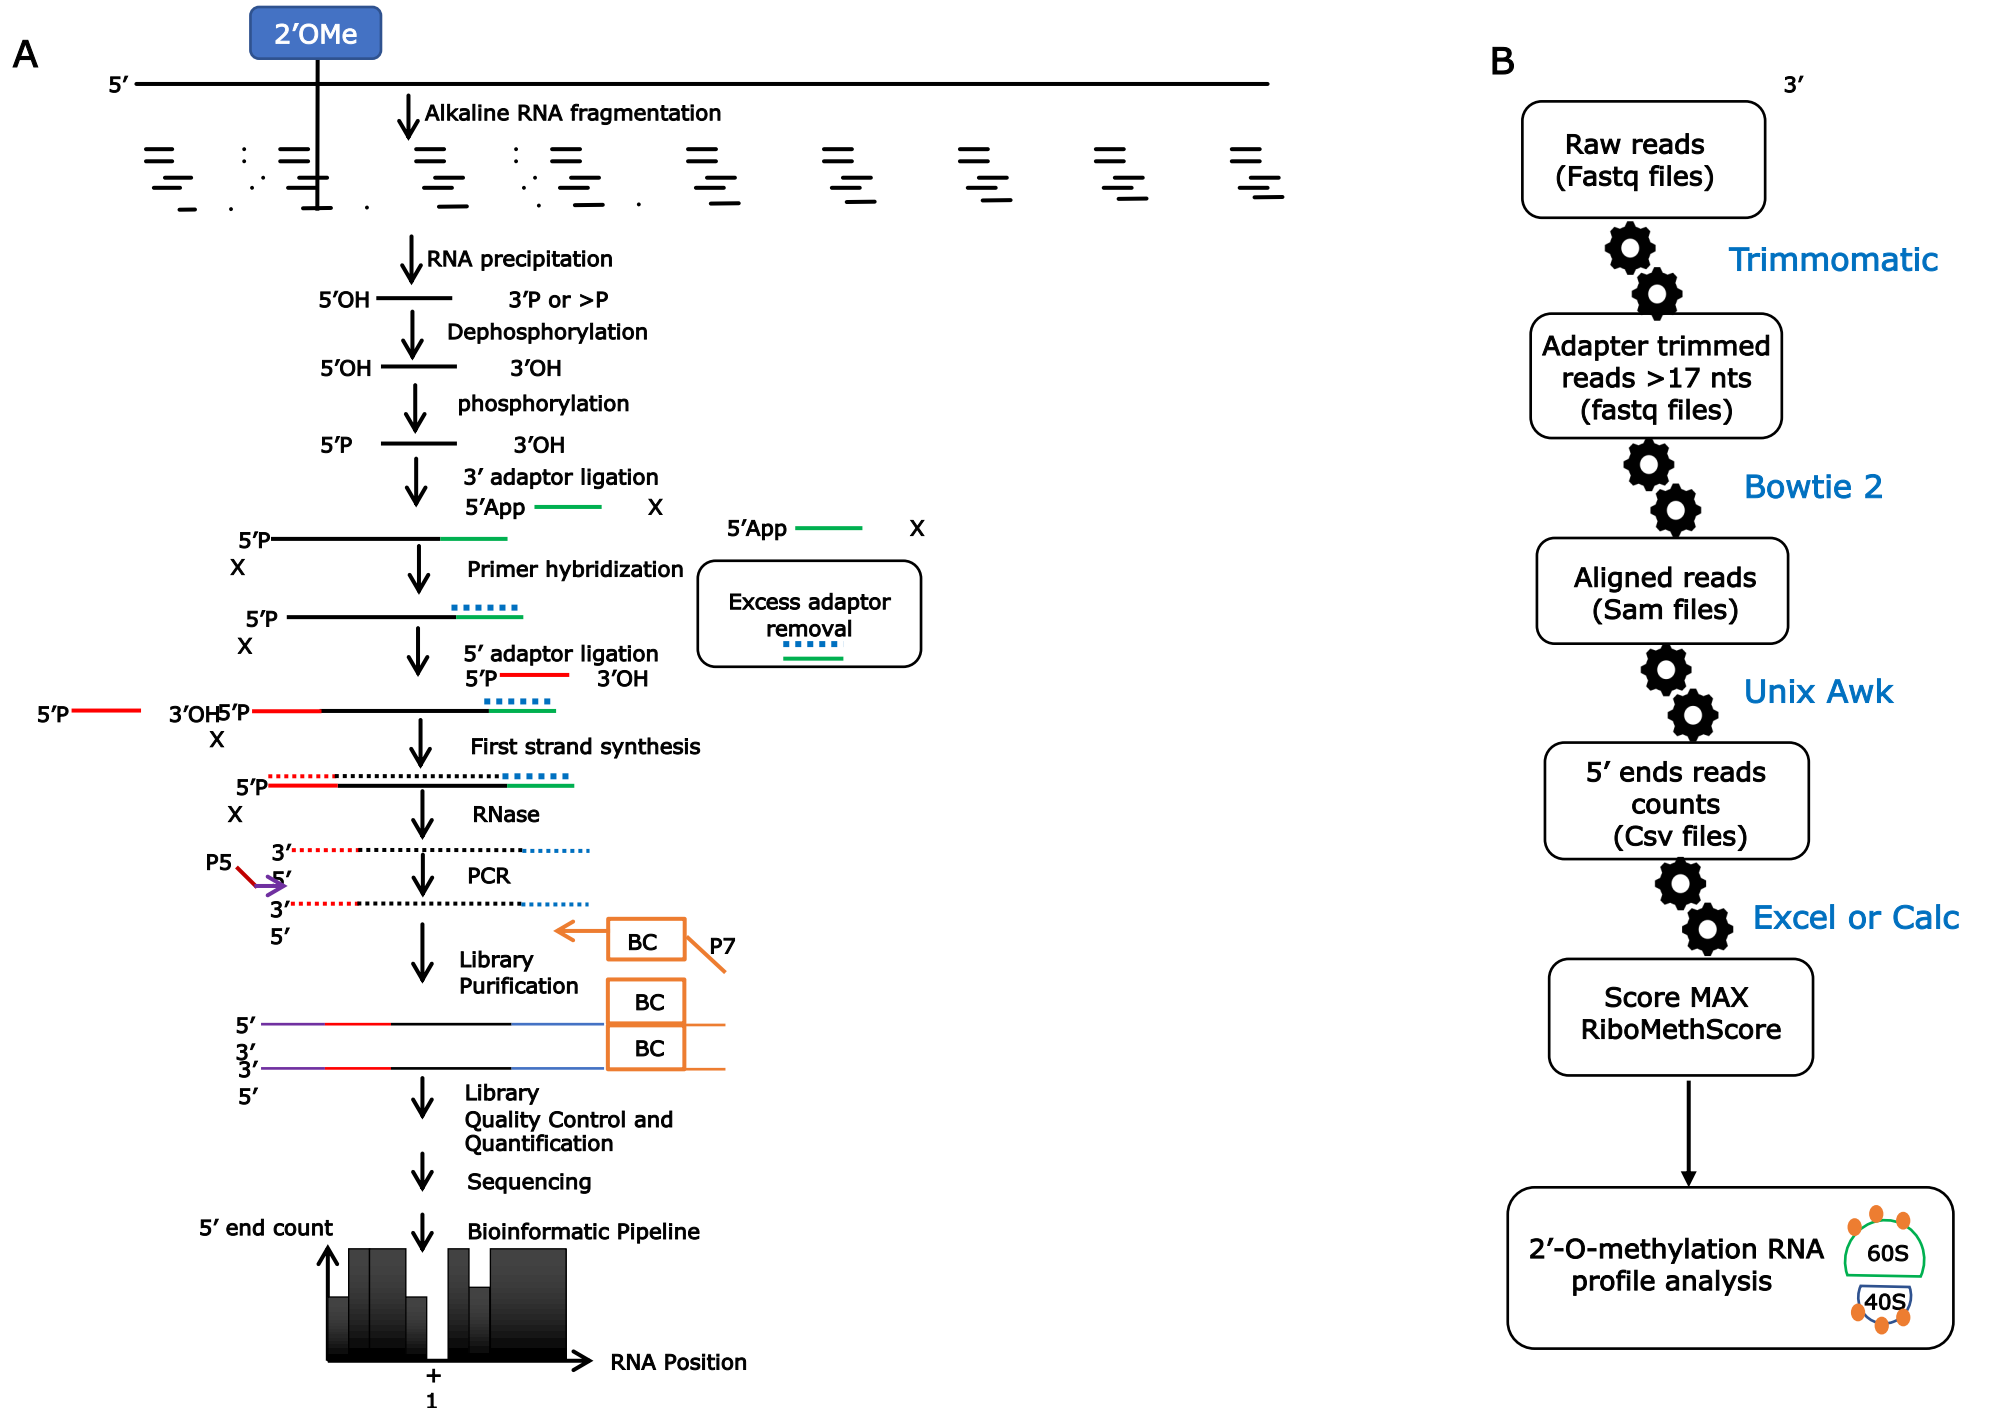

Supplement: mmc4.pdf [file mmc4.pdf]
